# Supplementary material for: Telemedical Approaches to Managing Gestational Diabetes Mellitus During COVID-19: Systematic Review
Source: PubMed Central journal article supplement (PMC8345174; doi:10.2196/28630), 2021-08-05
Supplement: pediatrics_v4i3e28630_app3.pdf [file pediatrics_v4i3e28630_app3.pdf]

## Overview of COVID-19 and GDM studies.

| Author, Year                        | Location | Study design | Pregnant women, n | Patient characteristics and medical history                                                                                                                                                                                                                                                                                                                                                                                                                                                                                                                                                                                                        | COVID-19                                                                                                                                                                                                                                                                                                                                                                                                                                                                                                                                                                                                                                                         | Maternal outcomes                                                                                                                                                                                                                                                                                                                                                                                                                                                                                                                                                                                                                                                                                                      | Offspring outcomes                                                                                                                                                                                                                                                                                                                                                                                                                                                                                                                                                                                                                                   |
|-------------------------------------|----------|--------------|-------------------|----------------------------------------------------------------------------------------------------------------------------------------------------------------------------------------------------------------------------------------------------------------------------------------------------------------------------------------------------------------------------------------------------------------------------------------------------------------------------------------------------------------------------------------------------------------------------------------------------------------------------------------------------|------------------------------------------------------------------------------------------------------------------------------------------------------------------------------------------------------------------------------------------------------------------------------------------------------------------------------------------------------------------------------------------------------------------------------------------------------------------------------------------------------------------------------------------------------------------------------------------------------------------------------------------------------------------|------------------------------------------------------------------------------------------------------------------------------------------------------------------------------------------------------------------------------------------------------------------------------------------------------------------------------------------------------------------------------------------------------------------------------------------------------------------------------------------------------------------------------------------------------------------------------------------------------------------------------------------------------------------------------------------------------------------------|------------------------------------------------------------------------------------------------------------------------------------------------------------------------------------------------------------------------------------------------------------------------------------------------------------------------------------------------------------------------------------------------------------------------------------------------------------------------------------------------------------------------------------------------------------------------------------------------------------------------------------------------------|
| <b>Blauvelt et al 2020</b>          | USA      | Case report  | 1                 | <ul style="list-style-type: none"> <li>34-year-old pregnant women with coronavirus infection, 28 weeks of gestation</li> <li>Asthma, A2 gestational diabetes, obesity, three prior cesarean delivery</li> <li>Vital signs at admission: temperature 36.9°C, blood pressure 117/66 mm Hg, heart rate 110 beats per minute, respiratory rate 30–40/min, and SpO<sub>2</sub> 93% on non-rebreather mask at 15 L/min, transitioned to high-flow nasal cannula. Initial PaO<sub>2</sub>/FiO<sub>2</sub> ratio was 163, plateau pressure 15 cmH<sub>2</sub>O, static compliance 80 mL/cmH<sub>2</sub>O and calculated dead space fraction 42%</li> </ul> | <ul style="list-style-type: none"> <li>Fever, malaise, myalgias, cough, shortness of breath ongoing hypoxemia (pH 7.41, PaCO<sub>2</sub> 26 mm Hg, PaO<sub>2</sub> 64 mm Hg, HCO<sub>3</sub> 16 mmol/L).</li> <li>Higher risk for mortality and morbidity in pregnant women and Covid-19</li> <li>Acute respiratory distress syndrome</li> <li>ICU admission, intubation</li> <li>Placenta showed acute chorioamnionitis</li> <li>Negative IgM and IgG</li> <li>incremental titration of positive end-expiratory pressure from 10 to 16 cmH<sub>2</sub>O</li> <li>FiO<sub>2</sub> requirement remained high at 80% and her static compliance worsened</li> </ul> | <ul style="list-style-type: none"> <li>lung overdistension, evidenced by decreased lung compliance and worsened hypercarbia indicating increased dead space</li> <li>develop hyperglycemia after antenatal corticosteroid administration</li> <li>required prolonged mechanical ventilation (until postpartum day 10)</li> <li>Shortly before delivery: FiO<sub>2</sub> increased to 100%, inhaled nitric oxide initiated at 20 ppm to temporarily improve oxygenation perioperatively, PaO<sub>2</sub> improved to 159 mm Hg (from 94 mm Hg).</li> <li>Following days PaO<sub>2</sub>/FiO<sub>2</sub> ratio improved, lung mechanics remained relatively stable</li> <li>Extubated on postoperative day 10</li> </ul> | <ul style="list-style-type: none"> <li>Intubated because of Respiratory distress syndrome</li> <li>Diffuse bilateral granular/ hazy opacities concerning for mild edema/ involving respiratory distress syndrome</li> <li>Laboratory test results showed leukopenia, neutropenia, lymphopenia, mild acidosis, and normal lactate</li> <li>Negative SARS-CoV-2 test and IgG and IgM</li> <li>1920g</li> <li>Apgar score 4-&gt;8</li> <li>Clear amniotic fluid</li> <li>At 16 days of life, neonate was clinically stable on high-flow nasal cannula at 3 L/min and 21% FiO<sub>2</sub></li> <li>normal findings on neurologic examination.</li> </ul> |
| <b>Cooke et al 2020</b>             | UK       | Case Report  | 1                 | <ul style="list-style-type: none"> <li>28-year-old,</li> <li>28<sup>+6</sup> weeks of gestation, GDM, Asian</li> </ul>                                                                                                                                                                                                                                                                                                                                                                                                                                                                                                                             | <ul style="list-style-type: none"> <li>fever, cough, diarrhoea and vomiting, was tachypnoeic, and bibasal pulmonary infiltrates supported a presumed SARS-CoV-2 diagnosis</li> <li>mechanical ventilation because tachypnoeic, c-section</li> </ul>                                                                                                                                                                                                                                                                                                                                                                                                              | <ul style="list-style-type: none"> <li>recovered rapidly</li> <li>experienced psychiatric sequelae post-operatively</li> </ul>                                                                                                                                                                                                                                                                                                                                                                                                                                                                                                                                                                                         | <ul style="list-style-type: none"> <li>no complication or bad outcome mentioned, birth weight 1400g, Apgar scores 1 -&gt; 3</li> </ul>                                                                                                                                                                                                                                                                                                                                                                                                                                                                                                               |
| <b>Vlachodimitropoul et al 2020</b> | Canada   | Case Report  | 1                 | <ul style="list-style-type: none"> <li>40-year-old women</li> <li>Gravida 2 para 1</li> <li>Familia neutropenia diagnosed in infancy (by admission neutropenia (0.1-0.3 × 10<sup>9</sup>/L))</li> <li>GDM</li> <li>lymphocyte count nadirs of 0.16</li> </ul>                                                                                                                                                                                                                                                                                                                                                                                      | <ul style="list-style-type: none"> <li>admitted at 35 + 3 weeks' gestation with cough and pyrexia</li> <li>Normotensive, tachycardic (110-121 beats/min), febrile (39°C), with normal oxygen saturation in room air</li> <li>SARS-CoV-2 was confirmed by polymerase chain reaction (PCR) on a nasopharyngeal swab</li> <li>Normal chest X-ray</li> <li>Over 48 hours, progressive thrombocytopenia, declining fibrinogen, rising activated partial thromboplastin time with concomitant improvement</li> </ul>                                                                                                                                                   | <ul style="list-style-type: none"> <li>sustained a postpartum hemorrhage of 1.5 L controlled with uterine artery ligation and B-Lynch compression, alongside uterotonics and blood products (tranexamic acid 2 g, fibrinogen 4 g, cryoprecipitate 10 units)</li> <li>C-section was performed</li> </ul>                                                                                                                                                                                                                                                                                                                                                                                                                | <ul style="list-style-type: none"> <li>obstetrical ultrasound demonstrated a well-grown fetus</li> <li>fetal heart rate monitoring was unremarkable</li> <li>healthy male infant was delivered, weighing 2.93 kg (Apgars of 9 and 9 at 1 and 5 minutes)</li> </ul>                                                                                                                                                                                                                                                                                                                                                                                   |

| Author, Year                       | Location | Study design | Pregnant women, n | Patient characteristics and medical history                                                                                                                                                                                                                                                                                                                                     | COVID-19                                                                                                                                                                                                                                                                                                                                                                          | Maternal outcomes                                                                                                                                                                                                                                                                                                                                                                                                                          | Offspring outcomes                                                                                                                                                                                                                                                                 |
|------------------------------------|----------|--------------|-------------------|---------------------------------------------------------------------------------------------------------------------------------------------------------------------------------------------------------------------------------------------------------------------------------------------------------------------------------------------------------------------------------|-----------------------------------------------------------------------------------------------------------------------------------------------------------------------------------------------------------------------------------------------------------------------------------------------------------------------------------------------------------------------------------|--------------------------------------------------------------------------------------------------------------------------------------------------------------------------------------------------------------------------------------------------------------------------------------------------------------------------------------------------------------------------------------------------------------------------------------------|------------------------------------------------------------------------------------------------------------------------------------------------------------------------------------------------------------------------------------------------------------------------------------|
|                                    |          |              |                   |                                                                                                                                                                                                                                                                                                                                                                                 | <ul style="list-style-type: none"> <li>in neutrophil count, responding to G-CSF</li> <li>Significantly elevated D-dimers were observed</li> <li>Description of mild transaminitis (underlying infection)</li> <li>Coagulopathy improvement was noted on postoperative day</li> </ul>                                                                                              |                                                                                                                                                                                                                                                                                                                                                                                                                                            |                                                                                                                                                                                                                                                                                    |
| <b>Govind et al 2020</b>           | UK       | Letter       | 1                 | <ul style="list-style-type: none"> <li>36-years-old, 38 w.o.g, Mode of delivery: Em C-Section, diet controlled GDM</li> </ul>                                                                                                                                                                                                                                                   | <ul style="list-style-type: none"> <li>Pneumonia, respiratory distress, Chest Xray revealed right basal consolidation and lymphopenia was noted (0.92 × 109/l; normal: 1.2–3.6)</li> </ul>                                                                                                                                                                                        | <ul style="list-style-type: none"> <li>Following delivery, patient continued to desaturate (80–85 %) on 100 % of oxygen</li> <li>transferred to a tertiary centre for extracorporeal membrane oxygenation (ECMO)</li> </ul>                                                                                                                                                                                                                | <ul style="list-style-type: none"> <li>Birth weight: 4165 g</li> <li>Viral pneumonia day 6 but recovered well</li> <li>Apgar scores 5-&gt; 9</li> <li>Ventilated for 10 days</li> <li>Developed pyrexia and exhibited signs of pneumonia on 6<sup>th</sup> day</li> </ul>          |
| <b>Kleinwechter / Laubner 2020</b> | Germany  | Case Report  | 1                 | <ul style="list-style-type: none"> <li>28-year-old pregnant women (Gravida 4, Para 2)</li> <li>GDM diagnosed in 25<sup>th</sup> w.o.g 75g-oGTT: 97 mg/dl fasted, 189 mg/dl after 1 h, 197 mg/dl after 2 (5.4 / 10.5 / 9.9 mmol/l)</li> <li>Admitted to University Hospital Freiburg (9ternistically)</li> <li>Day before admission, RT-PCR throat swab was positive.</li> </ul> | <ul style="list-style-type: none"> <li>&gt;39 °C fever, cough, loss of appetite</li> <li>Thrombocytopenia and lymphocytosis, elevated levels of LDH, creatine kinase, CRP and IL-6</li> <li>Three days after admission increasing dyspnoea with oxygen demand up to 5 l/min (by mask)</li> </ul>                                                                                  | <ul style="list-style-type: none"> <li>Deep-seated placenta occurred vaginal bleeding (temporary transfer to the delivery room and monitoring under tocolysis)</li> <li>Fever-free at day 6, oxygen requirement declining</li> <li>First control pharyngeal smear negative</li> </ul>                                                                                                                                                      |                                                                                                                                                                                                                                                                                    |
| <b>Oliva et al 2020</b>            | USA      | Case Report  | 1                 | <ul style="list-style-type: none"> <li>35-year-old pregnant women</li> <li>29<sup>37</sup> weeks of gestation</li> <li>gravida 10 para 7</li> <li>Pyelonephritis at 13 w.o.g</li> <li>GDM</li> </ul>                                                                                                                                                                            | <ul style="list-style-type: none"> <li>Fever (38,2 degree), dyspnea, myalgias, dysuria, cough</li> <li>Respiratory status worsen (by admission:95% to 92%), respiratory rate of 23/min, heart rate 109 (oxygen through venturi mask)</li> <li>Transaminitis and hypertriglyceridaemia because of medication</li> <li>Tachypneic</li> <li>D-dimer peaking at 3037 ng/mL</li> </ul> | <ul style="list-style-type: none"> <li>Status improved rapidly post-caesarean</li> <li>2 hours after delivery SpO2 to the low 90th percentile on room air, which improved to 100% on 15 L/min of oxygen</li> <li>by postoperative day 2, she was weaned to 4 L/min of oxygen via nasal cannula</li> <li>CT showed extensive bilateral patchy ground glass infiltrates and small consolidations</li> <li>Uncomplicated C-section</li> </ul> | <ul style="list-style-type: none"> <li>ICU admission with supplemental oxygen</li> <li>Birth weight 1705g</li> <li>Early cord clamping</li> <li>Apgar scores 9-&gt; 9</li> <li>Required supplement oxygen</li> <li>CXR on day 3 showed no evidence of pulmonary disease</li> </ul> |
| <b>Smati et al 2020</b>            | France   | Case Report  | 1                 | <ul style="list-style-type: none"> <li>36-year-old pregnant women from the Democratic Republic of Congo</li> <li>presented severe euglycaemic metabolic acidosis and significant ketonaemia (15.3 mmol/L)</li> <li>GDM (HbA1c at 6.1% (43.2 mmol/mol) on admission)</li> <li>BMI before pregnancy: 35,2</li> <li>gravida 9, para7</li> </ul>                                    | <ul style="list-style-type: none"> <li>Due to suspected preeclampsia, the patient underwent emergency caesarean section</li> <li>Viral infection might cause euglycaemic ketoacidosis in pregnant women because of stress</li> </ul>                                                                                                                                              | <ul style="list-style-type: none"> <li>Plasma insulin, C-peptide, glucagon and free fatty acid levels were assessed 2 days after delivery, showed no indications of insulin deficiency or metabolic failure</li> <li>ICU admission because of abdominal pain with nausea and vomiting associated with non-febrile dyspnea</li> </ul>                                                                                                       | <ul style="list-style-type: none"> <li>Birth weight 2445g</li> </ul>                                                                                                                                                                                                               |

| Author, Year                 | Location    | Study design                      | Pregnant women, n | Patient characteristics and medical history                                                                                                                                                                                                                                                                                                                                                                                                                                                                                                                                                                                                                                         | COVID-19                                                                                                                                                                                                                                                                                          | Maternal outcomes                                                                                                                                                                                                                                                                                                                                                                                                                                                                                                                                                                                                                                                                                     | Offspring outcomes                                                                                                                                                                                                                                                                                                                                               |
|------------------------------|-------------|-----------------------------------|-------------------|-------------------------------------------------------------------------------------------------------------------------------------------------------------------------------------------------------------------------------------------------------------------------------------------------------------------------------------------------------------------------------------------------------------------------------------------------------------------------------------------------------------------------------------------------------------------------------------------------------------------------------------------------------------------------------------|---------------------------------------------------------------------------------------------------------------------------------------------------------------------------------------------------------------------------------------------------------------------------------------------------|-------------------------------------------------------------------------------------------------------------------------------------------------------------------------------------------------------------------------------------------------------------------------------------------------------------------------------------------------------------------------------------------------------------------------------------------------------------------------------------------------------------------------------------------------------------------------------------------------------------------------------------------------------------------------------------------------------|------------------------------------------------------------------------------------------------------------------------------------------------------------------------------------------------------------------------------------------------------------------------------------------------------------------------------------------------------------------|
| <b>Uzel / Lakhno 2020</b>    | Turkey      | Case Report                       | 1                 | <ul style="list-style-type: none"> <li>35-year-old pregnant women (31 w.o.g.)</li> <li>GDM (Diagnosed at 24 weeks o.g.)</li> <li>Tested positive for Covid-19</li> </ul>                                                                                                                                                                                                                                                                                                                                                                                                                                                                                                            | <ul style="list-style-type: none"> <li>Dry cough, fever (38.2), dizziness</li> <li>Blood pressure 130/80 mm Hg</li> <li>Rate of respiratory 20 / minute</li> <li>Obese (BMI 40 kg/m<sup>2</sup>)</li> <li>Lymphopenia, hyperglycemia, trace of proteinuria and ketonuria were detected</li> </ul> | <ul style="list-style-type: none"> <li>Leukocytosis (<math>19 \times 10^3/\mu\text{L}</math>) and mild anemia (hemoglobin was 10.1 g/dL) were found in the clinical blood test.</li> <li>increased variables of serum urea, serum creatinine, serum ALT, serum AST, serum alka- line phosphatase were detected</li> <li>activated partial thromboplastin time, prothrombin time and international normalized ratio were prolonged. Levels of C-reactive protein (179.7 mg/L) and procalcitonin (0.15 ng/ml) were raised. Hemodynamics was not stable (blood pressure 70/40 mm Hg, pulse rate 130 per minute).</li> <li>Low saturation (75%)</li> <li>ICU admission</li> <li>Maternal death</li> </ul> | <ul style="list-style-type: none"> <li>fetal distress</li> <li>Apgar 1 -&gt; 3</li> <li>1900g</li> <li>NICU admission</li> <li>Early neonatal sepsis</li> <li>Negative tested for Covid-19</li> </ul>                                                                                                                                                            |
| <b>Tang et al 2020</b>       | China       | Case Report                       | 1                 | <ul style="list-style-type: none"> <li>symptomatic, 34-years old, GDM (insulin treatment)</li> </ul>                                                                                                                                                                                                                                                                                                                                                                                                                                                                                                                                                                                | <ul style="list-style-type: none"> <li>fever, shortness of breath, dyspnea, negative PCR for SARS-CoV-2; positive IgM and IgG antibodies, in both lungs scattered patchy lesions and small amount of left-sided pleural effusion</li> </ul>                                                       | <ul style="list-style-type: none"> <li>No serious complications at delivery</li> <li>C-section</li> </ul>                                                                                                                                                                                                                                                                                                                                                                                                                                                                                                                                                                                             | <ul style="list-style-type: none"> <li>born at 37<sup>16</sup>, 4,000g birth weight, Apgar scores 9 -&gt; 10, yellowish skin on second day, bilirubin of 11.3 mg/dL; negative tested; on day 7 IgG positive</li> </ul>                                                                                                                                           |
| <b>D'Ambrosi et al 2020</b>  | Italy       | Retrospective single center study | 6                 | <ul style="list-style-type: none"> <li>C1: 32-years-old, Caucasian, Insulin requiring, Gestational Age at Covid-19 diagnosis: 38+1, 6 days hospitalized</li> <li>C2: 26-years-old, Diet, Magreb, Gestational age at COVID-19 diagnosis: 38+2, 7 days hospitalized</li> <li>C3: 27-years-old, Magreb, Age at Covid-19 diagnosis: 33+1, 6 days hospitalized</li> <li>C4: 37-years-old, Hispanic, Diet, Age at Covid-19 diagnosis: 39+0, 11 days hospitalized</li> <li>C5: 32-years-old, Magreb, Diet, Age at Covid-19 diagnosis: 29,+1, 49 days hospitalized</li> <li>C6: 40-years-old, Caucasian, Insulin requiring, 7 days hospitalized, Age at Covid-19 diagnosis: 27+1</li> </ul> | <ul style="list-style-type: none"> <li>4/6 had COVID-Symptoms (fever, dyspnea)</li> <li>Two were asymptomatic</li> </ul>                                                                                                                                                                          | <ul style="list-style-type: none"> <li>Two vaginal deliveries, 4 elective C-Sections</li> <li>5/6 multiparous</li> <li>2/6 Radiological signs</li> <li>No ICU requiring or mechanical ventilations</li> <li>One woman required hospitalization for more than 7 days</li> </ul>                                                                                                                                                                                                                                                                                                                                                                                                                        | <ul style="list-style-type: none"> <li>C1: birth weight 3670g, Apgar at 5 min: 10</li> <li>C2: birth weight 3000g, Apgar at 5 min: 10</li> <li>C3: birth weight 3766g, Apgar at 5 min: 10</li> <li>C4: birth weight 3766g, Apgar at 5 min: 10</li> <li>C5: birth weight 2095g, Apgar at 5 min: 10</li> <li>C6: birth weight 3640g, Apgar at 5 min: 10</li> </ul> |
| <b>Fontanella et al 2020</b> | Netherlands | Letter                            | 1                 | <ul style="list-style-type: none"> <li>38-years-old Caucasian pregnant women, diet controlled GDM, BMI 46, admitted to hospital at 31<sup>16</sup> weeks</li> </ul>                                                                                                                                                                                                                                                                                                                                                                                                                                                                                                                 | <ul style="list-style-type: none"> <li>COVID symptoms: dry cough, dyspnea, oxygen desaturation (94 on 3 Liter of oxygen), thoracic pain with deep breathing,</li> <li>CPR, LDH, Glucose levels increased</li> <li>Needed oxygen support and molecular weight heparin</li> </ul>                   | <ul style="list-style-type: none"> <li>Day 2 and 3 betamethasone administered and further conservative management</li> <li>Thromboprophylaxis started from day 1</li> <li>No adverse outcome reported, mother left hospital after 5 days because of rapid improvement</li> </ul>                                                                                                                                                                                                                                                                                                                                                                                                                      | <ul style="list-style-type: none"> <li>No adverse outcome</li> <li>Fetal lung maturations prevented by corticosteroids</li> </ul>                                                                                                                                                                                                                                |

| Author, Year                   | Location | Study design | Pregnant women, n | Patient characteristics and medical history                                                                                                                                                                                                                                                                                                          | COVID-19                                                                                                                                                                                                                                                                                                                                                                                                                                                                                                                                                          | Maternal outcomes                                                                                                                                                                                                                                                                                                                                                                                                                                                                                                                                                                                                    | Offspring outcomes                                                                                                                                                                                                                                                                                                                                                                                             |
|--------------------------------|----------|--------------|-------------------|------------------------------------------------------------------------------------------------------------------------------------------------------------------------------------------------------------------------------------------------------------------------------------------------------------------------------------------------------|-------------------------------------------------------------------------------------------------------------------------------------------------------------------------------------------------------------------------------------------------------------------------------------------------------------------------------------------------------------------------------------------------------------------------------------------------------------------------------------------------------------------------------------------------------------------|----------------------------------------------------------------------------------------------------------------------------------------------------------------------------------------------------------------------------------------------------------------------------------------------------------------------------------------------------------------------------------------------------------------------------------------------------------------------------------------------------------------------------------------------------------------------------------------------------------------------|----------------------------------------------------------------------------------------------------------------------------------------------------------------------------------------------------------------------------------------------------------------------------------------------------------------------------------------------------------------------------------------------------------------|
|                                |          |              |                   |                                                                                                                                                                                                                                                                                                                                                      | <ul style="list-style-type: none"> <li>CT scan found bilateral ground glass opacities suggestive of COVID-19 pneumonia</li> <li>First nasopharyngeal swab was negative, second positive</li> </ul>                                                                                                                                                                                                                                                                                                                                                                |                                                                                                                                                                                                                                                                                                                                                                                                                                                                                                                                                                                                                      |                                                                                                                                                                                                                                                                                                                                                                                                                |
| <b>Gidlöf et al 2020</b>       | Sweden   | Letter       | 1                 | <ul style="list-style-type: none"> <li>34-year-old pregnant women, dichorionic twin pregnancy, BMI 38 kg/m<sup>2</sup> and diagnosed with GDM at 29 weeks, hospitalized at 36<sup>+2/7</sup> weeks, severe preeclampsia</li> </ul>                                                                                                                   | <ul style="list-style-type: none"> <li>COVID symptoms: mild headache, hoarseness, increasing malaise at admission</li> <li>oxygen saturation 96%, respiration rate 11/min., body temperature 38,0 degree, BP 170/100 mm HG heart rate 85 beats/min.,</li> <li>Creatinine: 89 µmol/L (reference &lt;90 µmol/L) and uric acid 510 µmol/L (reference 155-350 µmol/L).</li> <li>7 hours after hospitalization severe headache, photophobia, brisk patellar reflex</li> <li>On third day, oxygen dropped to 87%, CT showed typical COVID-19 pneumonia signs</li> </ul> | <ul style="list-style-type: none"> <li>Three hours after delivery positive COVID-19 test result</li> <li>BP remained stable, the temperature normalized after first postoperative day</li> <li>On 3<sup>rd</sup> day, oxygen saturation dropped to 87%, which was managed successfully with oxygen, 1-3 L/min via a nasal cannula</li> <li>CRP reached 88 mg/L on 4<sup>th</sup> day but fell to 38 mg/L on the 6<sup>th</sup> day</li> <li>Test on breastmilk and maternal vaginal secretion on the 5<sup>th</sup> day were negative</li> <li>Emergency C-section, three hours later positive COVID test</li> </ul> | <ul style="list-style-type: none"> <li>Babies (two girls) were delivered in good condition</li> <li>Because of GDM, both babies were formula-fed</li> <li>C1: 2680g, Apgar score 9,10 and 10 at 1,5 and 10 minutes, developed breathing problems at 22 minutes, cyanotic attack while feeding on day two</li> <li>C2: 2160g, Apgar 9,10 and 10</li> <li>Both twins had negative nasopharyngeal swab</li> </ul> |
| <b>Majachani et al 2020</b>    | Grenada  | Case Report  | 1                 | <ul style="list-style-type: none"> <li>31-year-old Hispanic women with SARS-CoV-2, HIV positive, GDM</li> <li>C-Section at 34 w.o.g</li> </ul>                                                                                                                                                                                                       | <ul style="list-style-type: none"> <li>COVID symptoms: shortness of breath and myalgia (mild symptoms)</li> <li>White blood cell count of 10.000 cells/mm<sup>3</sup></li> <li>Chest X-ray showed bibasilar opacities</li> </ul>                                                                                                                                                                                                                                                                                                                                  |                                                                                                                                                                                                                                                                                                                                                                                                                                                                                                                                                                                                                      | <ul style="list-style-type: none"> <li>Initial examination was normal</li> <li>Apgar score 9/10 at 1 and 5 mins.</li> <li>NICU admission (for 10 days) for hypoglycemia monitoring and continuous cardiac, respiratory and pulse oximetry monitoring</li> <li>Nasopharyngeal swab after 24 h positive (no signs of respiratory distress and 95% oxygen)</li> </ul>                                             |
| <b>Pulinx et al 2020</b>       | Belgium  | Case Report  | 1                 | <ul style="list-style-type: none"> <li>30-year-old women (gravida 2, para 1)</li> <li>hospitalized at 22 w.o.g, pregnant with dichorionic diamniotic twins, GDM</li> <li>Negative tested for toxoplasma IgG and IgM antibodies at 21 w.o.g</li> <li>Tested positive for SARS-CoV-2 RT-PCR on a nasopharyngeal swab</li> <li>Preterm birth</li> </ul> | <ul style="list-style-type: none"> <li>Rhinitis and fever (39,2 degree), oxygen saturation 98%, X-Ray showed no abnormalities</li> <li>Maternal Blood samples were tested positive for SARS-CoV-2</li> <li>Aggregates of histiocytes and cytotoxic T lymphocytes in the intervillous space were also present and confirmed (findings supported the diagnosis of chronic intervillitis)</li> </ul>                                                                                                                                                                 | <ul style="list-style-type: none"> <li>In the fetal circulation, nuclear debris and an increase in erythroblasts (as can be seen in fetal hypoxia)</li> </ul>                                                                                                                                                                                                                                                                                                                                                                                                                                                        | <ul style="list-style-type: none"> <li>The fetal demise of fetus one was diagnosed and fetus two showed fetal heart rate decelerations</li> <li>Prepartal intrauterine death of fetus one and prepartal death of fetus two</li> </ul>                                                                                                                                                                          |
| <b>Kleinwechter et al 2021</b> | Germany  | Case series  | 21                | <ul style="list-style-type: none"> <li>Median age 34 years</li> <li>1/3 was obese at the beginning of pregnancy</li> </ul>                                                                                                                                                                                                                           | <ul style="list-style-type: none"> <li>Half of the women were asymptomatic (11/21)</li> </ul>                                                                                                                                                                                                                                                                                                                                                                                                                                                                     | <ul style="list-style-type: none"> <li>In 2 cases admission to the intensive care unit, and in 4 cases the women</li> </ul>                                                                                                                                                                                                                                                                                                                                                                                                                                                                                          | <ul style="list-style-type: none"> <li>17 live births (at the time of the evaluation) of which 1 time twins, median in the 39th week of pregnancy, no early births</li> </ul>                                                                                                                                                                                                                                  |

| Author, Year      | Location | Study design | Pregnant women, n | Patient characteristics and medical history                                                                                                                                                                                                                                | COVID-19                                                                                                                                                                                                                                    | Maternal outcomes                                                                                                                                               | Offspring outcomes                                                                                                                                                                                                                                                                                                                                                                                  |
|-------------------|----------|--------------|-------------------|----------------------------------------------------------------------------------------------------------------------------------------------------------------------------------------------------------------------------------------------------------------------------|---------------------------------------------------------------------------------------------------------------------------------------------------------------------------------------------------------------------------------------------|-----------------------------------------------------------------------------------------------------------------------------------------------------------------|-----------------------------------------------------------------------------------------------------------------------------------------------------------------------------------------------------------------------------------------------------------------------------------------------------------------------------------------------------------------------------------------------------|
|                   |          |              |                   | <ul style="list-style-type: none"> <li>GDM diagnosed at 24-28 weeks</li> <li>SARS-Cov-2 diagnosed at median 38 weeks</li> </ul>                                                                                                                                            | <ul style="list-style-type: none"> <li>Most common symptoms: cough (6/21), tiredness (6/21), malaise (6/21), nasal congestion (7/21) changes in smell and taste (5/24)</li> <li>Mostly mild to moderate course in women with GDM</li> </ul> | <p>received a symptomatic COVID-19-associated therapy</p> <ul style="list-style-type: none"> <li>No invasive ventilation</li> <li>56 % sectio (9/16)</li> </ul> |                                                                                                                                                                                                                                                                                                                                                                                                     |
| Rabiei et al 2021 | Iran     | Case report  | 1                 | <ul style="list-style-type: none"> <li>38 year-old Iranian with triplet</li> <li>Blood pressure 140/90 mmHg</li> <li>Elevated liver enzymes</li> <li>Pregnant by ovulation induction</li> <li>Hpothyroidism</li> <li>16 units insulin daily</li> <li>HbA1c 5.6%</li> </ul> | <ul style="list-style-type: none"> <li>Mild fever</li> <li>No shortness of breath, diarrhea, nausea or vomiting</li> <li>Oxygen saturation above 96%</li> </ul>                                                                             | <ul style="list-style-type: none"> <li>Cesarean section</li> </ul>                                                                                              | <ul style="list-style-type: none"> <li>First baby: birth weight: 1320g (5-min APGAR was 4)</li> <li>Second baby:: birth weight 1600g (5-min APGAR was 7)</li> <li>Third baby: birth weight 1250g (5-min APGAR was 6)</li> <li>Admission to Neonatal intensive care unit</li> <li>All three: symptoms of spsis and pulmonary hemorrhage</li> <li>COVID-19 test was negative for all three</li> </ul> |
