# Supplementary material for: Telemedical Approaches to Managing Gestational Diabetes Mellitus During COVID-19: Systematic Review
Source: PubMed Central journal article supplement (PMC8345174; doi:10.2196/28630), 2021-08-05
Supplement: pediatrics_v4i3e28630_app4.pdf [file pediatrics_v4i3e28630_app4.pdf]

## Quality assessments.

| Question/<br>Trial            | A<br>Seletion<br>Bias<br>(Q1) | A<br>Selection<br>Bias (Q2) | A<br>SCORE | B<br>Study<br>Design | B<br>SCORE | C<br>Confoun-<br>ders (Q1) | C<br>Confoun-<br>ders (Q2) | C<br>SCORE | D<br>Blinding<br>(Q1) | D<br>Blinding<br>(Q2) | D<br>SCORE | E<br>Data<br>collection<br>(Q1) | E<br>Data<br>Collection<br>(Q2) | E<br>SCORE | F<br>Withdrawals<br>and Drop-<br>outs (Q1) | F<br>Withdrawals<br>and Drop-<br>outs (Q2) | F<br>SCORE | GLOBAL<br>RATING |
|-------------------------------|-------------------------------|-----------------------------|------------|----------------------|------------|----------------------------|----------------------------|------------|-----------------------|-----------------------|------------|---------------------------------|---------------------------------|------------|--------------------------------------------|--------------------------------------------|------------|------------------|
| Perez-<br>Ferre et al<br>2010 | 1                             | 1                           | **         | 1                    | ***        | 2                          | /                          | ***        | 3                     | 3                     | **         | 1                               | 1                               | ***        | 1                                          | 1                                          | ***        | <b>Strong</b>    |
| Dalfra et al<br>2009          | 1                             | 1                           | **         | 1                    | ***        | 2                          | /                          | ***        | 1                     | 1                     | *          | 1                               | 1                               | ***        | 1                                          | 1                                          | ***        | <b>Strong</b>    |
| Guo et al<br>2019             | 1                             | 1                           | **         | 1                    | ***        | 2                          | /                          | ***        | 1                     | 1                     | *          | 1                               | 1                               | ***        | 1                                          | 1                                          | ***        | <b>Strong</b>    |
| Homko et<br>al 2007           | 1                             | 1                           | **         | 1                    | ***        | 2                          | /                          | ***        | 1                     | 3                     | **         | 1                               | 1                               | ***        | 1                                          | 1                                          | ***        | <b>Strong</b>    |
| Given et al<br>2015           | 1                             | 2                           | **         | 1                    | ***        | 2                          | /                          | ***        | 1                     | 1                     | *          | 1                               | 1                               | ***        | 1                                          | 1                                          | ***        | <b>Moderate</b>  |
| Homko et<br>al 2012           | 1                             | 5                           | *          | 1                    | ***        | 2                          | /                          | ***        | 3                     | 3                     | **         | 1                               | 1                               | ***        | 1                                          | 1                                          | ***        | <b>Moderate</b>  |
| Mackillop<br>et al 2018       | 1                             | 1                           | **         | 1                    | ***        | 2                          | /                          | ***        | 3                     | 3                     | **         | 1                               | 1                               | ***        | 1                                          | 1                                          | ***        | <b>Moderate</b>  |
| Yang et al<br>2018            | 1                             | 5                           | *          | 1                    | ***        | 2                          | /                          | ***        | 3                     | 3                     | **         | 1                               | 1                               | ***        | 1                                          | 1                                          | ***        | <b>Moderate</b>  |
| Kim et al<br>2019             | 1                             | 5                           | *          | 2                    | ***        | 2                          | /                          | ***        | 1                     | 1                     | *          | 1                               | 1                               | ***        | 1                                          | 1                                          | ***        | <b>Weak</b>      |

\* = week, \*\* = moderate, \*\*\* = strong, 1-5 = response options according to EPHP, / = not applicable
