# Supplementary material for: Telemedical Approaches to Managing Gestational Diabetes Mellitus During COVID-19: Systematic Review
Source: PubMed Central journal article supplement (PMC8345174; doi:10.2196/28630), 2021-08-05
Supplement: pediatrics_v4i3e28630_app6.pdf [file pediatrics_v4i3e28630_app6.pdf]

Forest plot using HbA<sub>1c</sub> values (%) at the end of the study

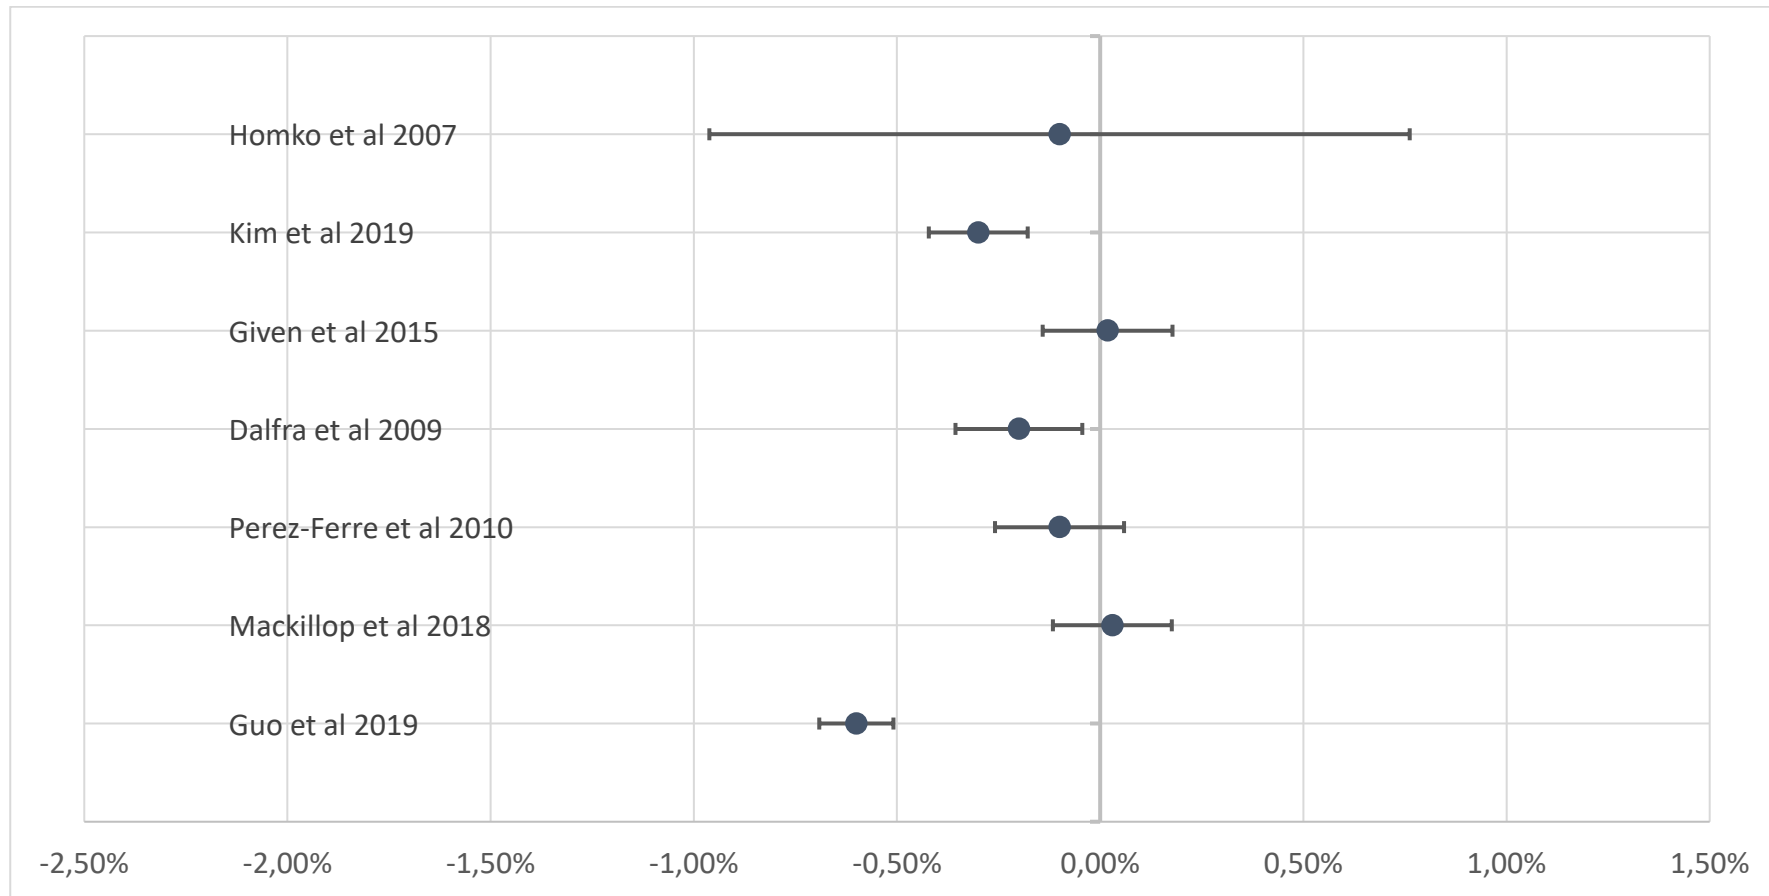

## Calculations and data for meta-analysis

|                        |    | n   | Mean  | Std     | Effect size | Pooled Std** | t     | CI*** | plot line | plot labels |
|------------------------|----|-----|-------|---------|-------------|--------------|-------|-------|-----------|-------------|
| Homko et al 2007       | IG | 34  | 6,10% | 0,80%   | -0,10%      | 0,43%        | 2,000 | 0,86% | 7         | -2,20%      |
| Homko et al 2007       | CG | 29  | 6,20% | 2,20%   |             |              |       |       |           |             |
| Kim et al 2019         | IG | 22  | 5,00% | 0,20%   | -0,30%      | 0,06%        | 2,018 | 0,12% | 6         | -2,20%      |
| Kim et al 2019         | CG | 22  | 5,30% | 0,20%   |             |              |       |       |           |             |
| Given et al 2015       | IG | 24  | 5,26% | 0,30% * | 0,02%       | 0,08%        | 2,011 | 0,16% | 5         | -2,20%      |
| Given et al 2015       | CG | 26  | 5,25% | 0,26% * |             |              |       |       |           |             |
| Dalfrà et al 2009      | IG | 88  | 5,10% | 0,60%   | -0,20%      | 0,08%        | 1,972 | 0,16% | 4         | -2,20%      |
| Dalfrà et al 2009      | CG | 115 | 5,30% | 0,50%   |             |              |       |       |           |             |
| Perez-Ferre et al 2010 | IG | 50  | 5,30% | 0,40%   | -0,10%      | 0,08%        | 1,984 | 0,16% | 3         | -2,20%      |
| Perez-Ferre et al 2010 | CG | 50  | 5,40% | 0,40%   |             |              |       |       |           |             |
| Mackillop et al 2018   | IG | 42  | 5,42% | 0,34%   | 0,03%       | 0,07%        | 1,988 | 0,15% | 2         | -2,20%      |
| Mackillop et al 2018   | CG | 46  | 5,39% | 0,35%   |             |              |       |       |           |             |
| Guo et al 2019         | IG | 64  | 4,70% | 0,20%   | -0,60%      | 0,05%        | 1,980 | 0,09% | 1         | -2,20%      |
| Guo et al 2019         | CG | 60  | 5,30% | 0,30%   |             |              |       |       |           |             |
